# Supplementary material for: Prognostic Role of PD-L1 Expression in Invasive Breast Cancer: A Systematic Review and Meta-Analysis
Source: MDPI journal article supplement (doi:10.3390/cancers13236090), 2021-12-03
Supplement: s1 [file s1]

A

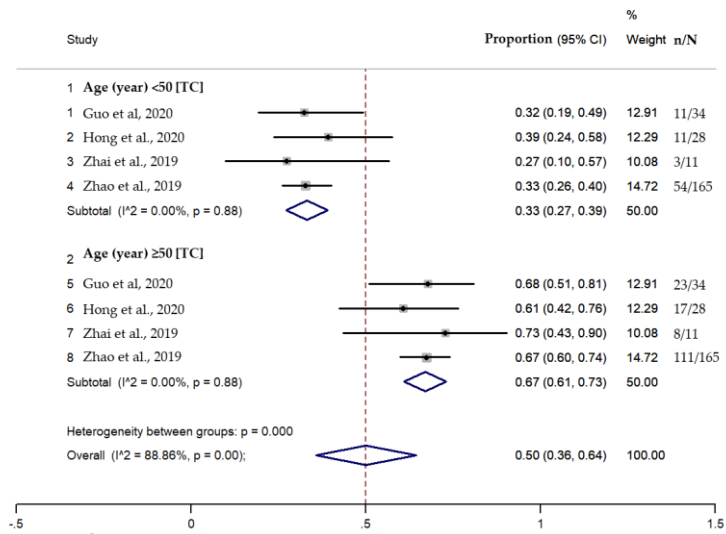

B

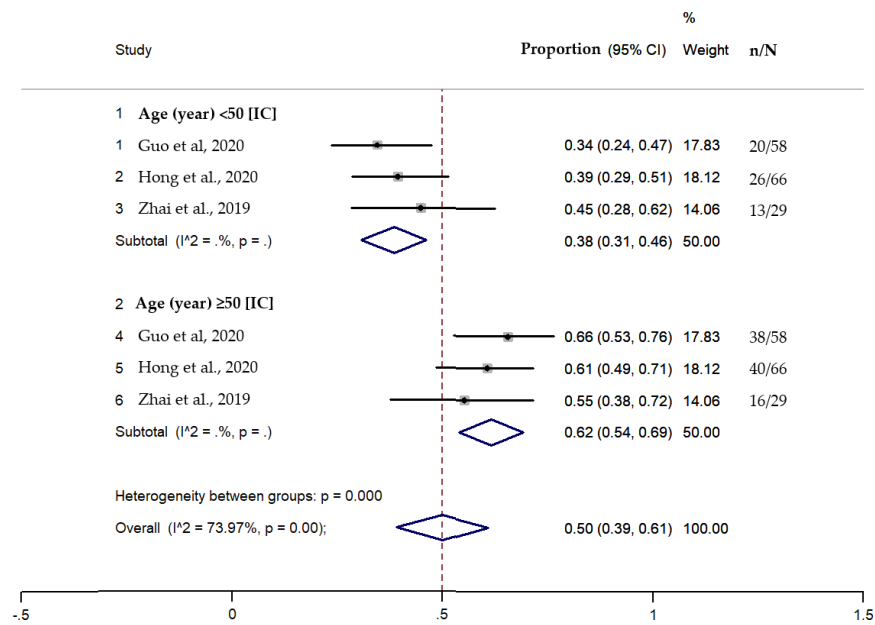

C

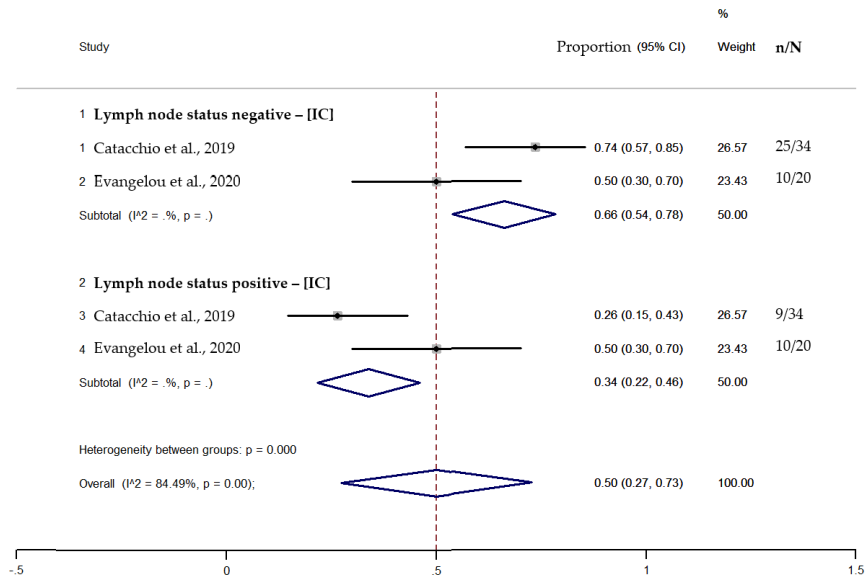

D

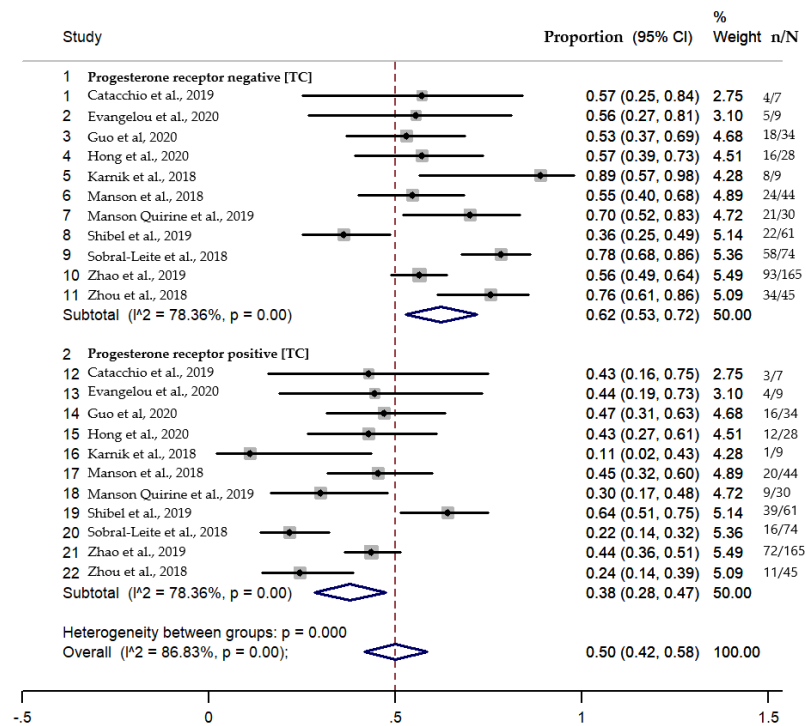

E

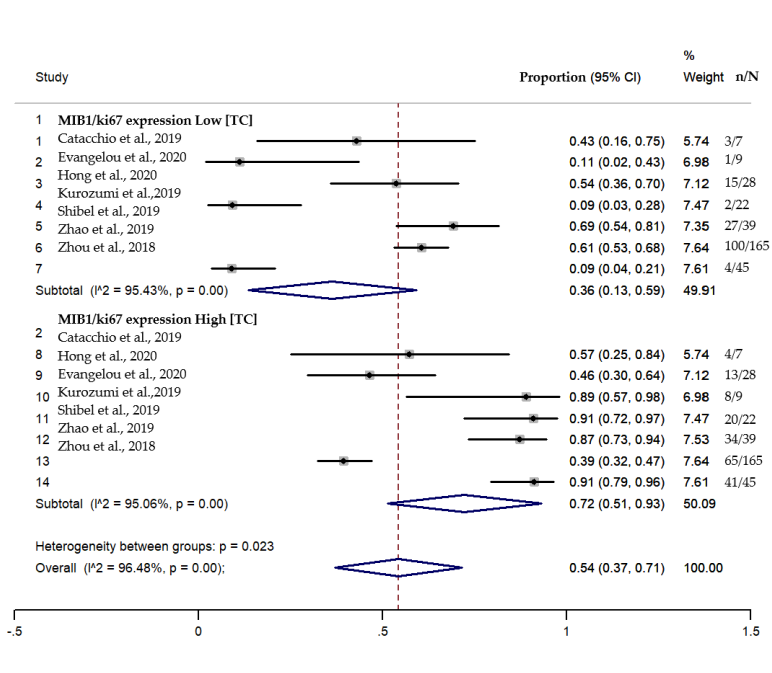

F

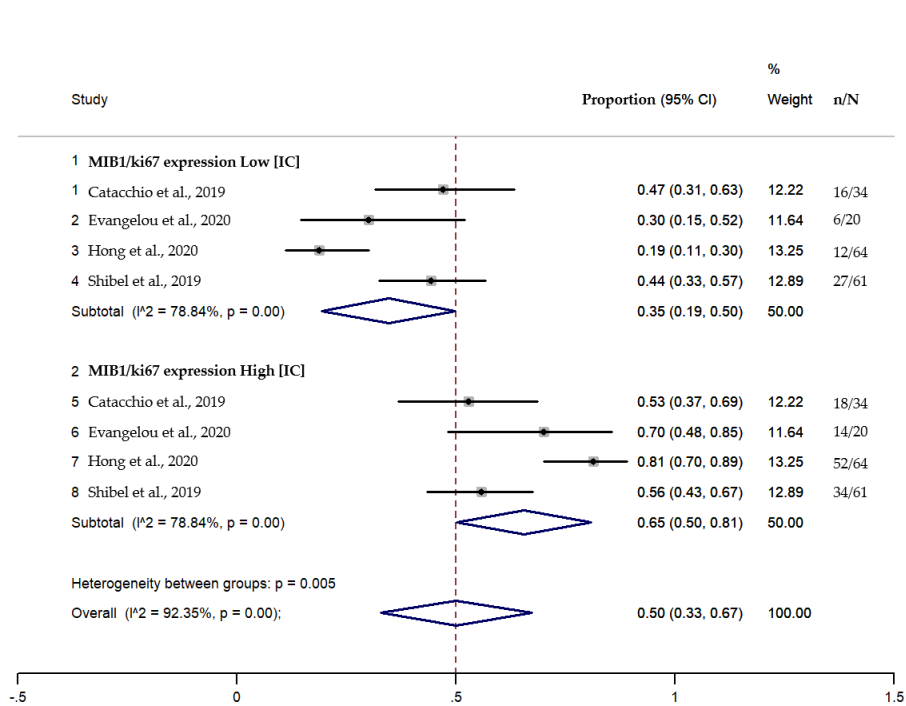

G

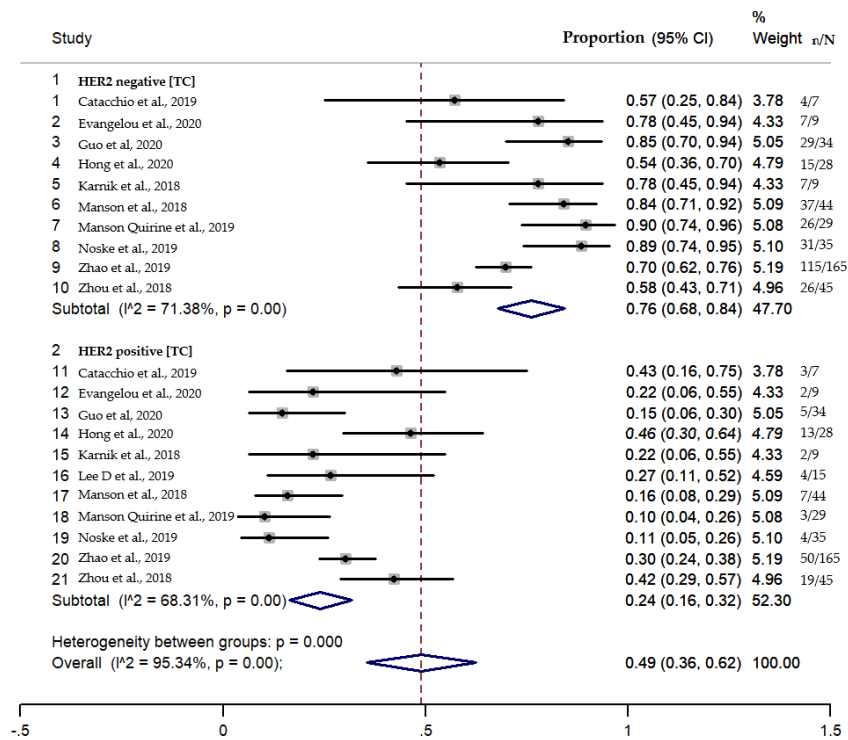

H

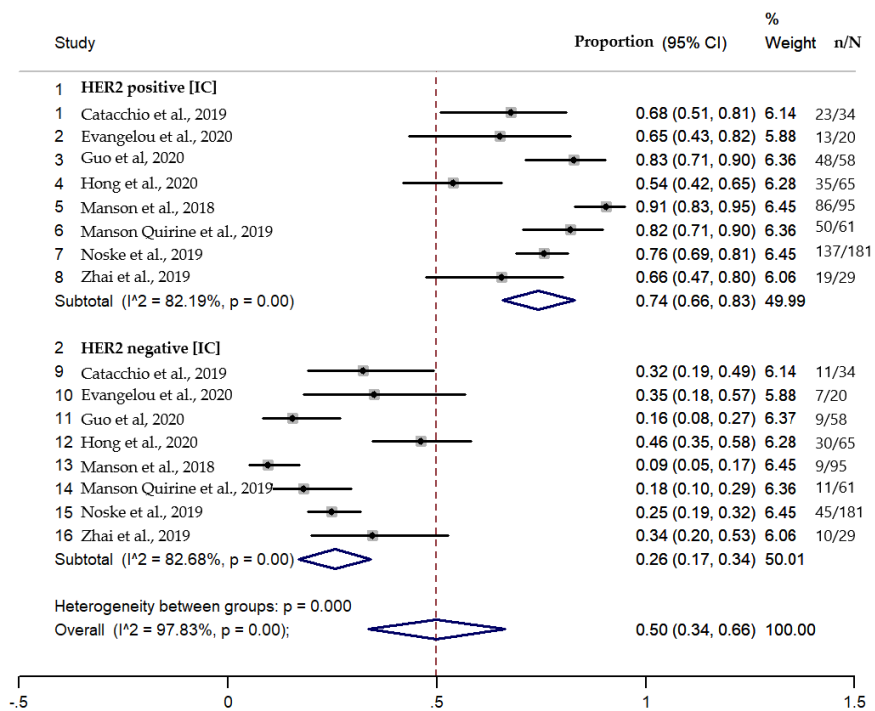

**Figure S1.** Forest plot of prevalence (%) of PD-L1 expression according to Age (A,B), Lymph node status (C), PR status (D), Ki-67 index (E,F) and HER2 status (G,H).
